# Supplementary material for: Preparation of porous silicon composite anode material coated with open pore polymethyl acrylate and its electrochemical performance as a carbon source
Source: Royal Society of Chemistry journal article supplement (doi:10.1039/d3nj04109c), 2023-01-01
Supplement: d3nj04109c1.pdf [file d3nj04109c1.pdf]

## Supporting Information

### Preparation of Porous Silicon Composite Anode Material Coated with Open Pore Polymethyl Acrylate and its Electrochemical Performance as a Carbon Source

Simin Liao,<sup>a</sup> Xiang Shi,<sup>a</sup> Yefei Xu,<sup>a</sup> Mengyue Liu,<sup>a</sup> Nengwen Ding,<sup>\*a,b</sup> Xiaocheng Li<sup>a,b</sup> and Zhifeng Li<sup>a,b</sup>

✉ Nengwen Ding

E-mail: ding\_0321@126.com

a. Jiangxi Key Laboratory of Power Batteries and Materials, Faculty of Materials Metallurgy and Chemistry, Jiangxi University of Sciences and Technology, Ganzhou 341000, China.

b. Yichun Lithium New Energy Industry Research Institute, Jiangxi University of Science and Technology, Yichun 336000, China.

Table S1. BET adsorption parameters of PSi and PSi@C samples

| Sample          | Specific surface area (m <sup>2</sup> /g) | Total pore volume (cm <sup>3</sup> /g) | Average pore diameter (nm) |
|-----------------|-------------------------------------------|----------------------------------------|----------------------------|
| PSi             | 78.86                                     | 0.52                                   | 26.58                      |
| Unopened PSi@C  | 15.83                                     | 0.038                                  | 9.74                       |
| Open pore PSi@C | 27.56                                     | 0.23                                   | 32.97                      |

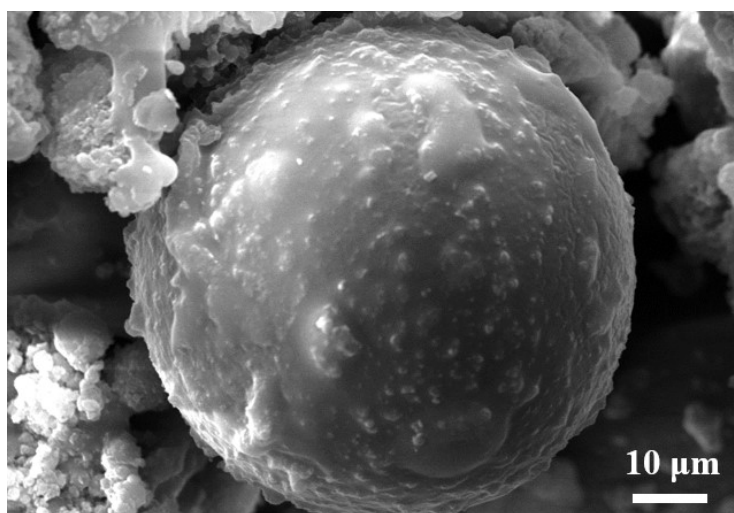

Fig.S1 SEM images of PSi@PMA microspheres before carbonization.

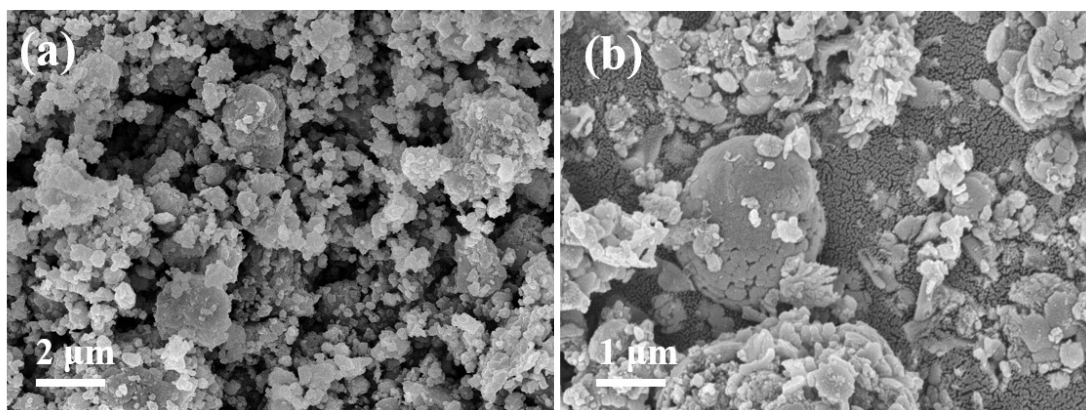

Fig.S2 (a-b) shows the SEM image of PSi@C microspheres after carbonization without opening process.

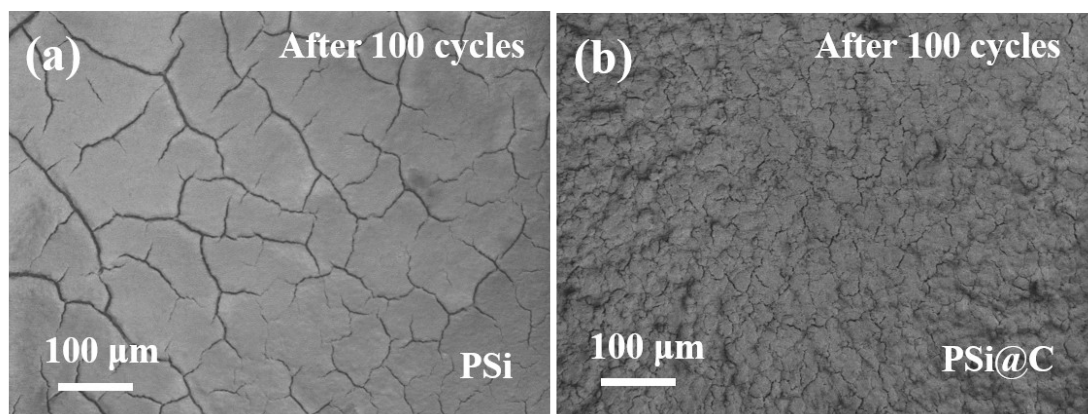

Fig.S3 SEM images of surface cracking of PSi electrode (a) and PSi@C electrode (b) after 100 cycles.

Table S2. AC impedance parameters of open-pore and unopened-pore carbon coated electrodes

| Sample             | Number of cycles | $R_s$ ( $\Omega$ ) | $R_{ct}$ ( $\Omega$ ) | $D_{Li^+}$ ( $cm^2s^{-1}$ ) |
|--------------------|------------------|--------------------|-----------------------|-----------------------------|
| Unopened<br>PSi@C  | 0                | 5.67               | 173.21                | $1.91 \times 10^{-14}$      |
|                    | 3                | 3.43               | 65.51                 | $3.36 \times 10^{-14}$      |
|                    | 10               | 29.24              | 75.11                 | $1.75 \times 10^{-11}$      |
|                    | 55               | 7.31               | 69.91                 | $6.94 \times 10^{-11}$      |
|                    | 300              | 11.49              | 32.62                 | $3.71 \times 10^{-10}$      |
| Open pore<br>PSi@C | 0                | 5.24               | 72.91                 | $1.32 \times 10^{-13}$      |
|                    | 3                | 9.62               | 64.57                 | $1.90 \times 10^{-11}$      |
|                    | 10               | 20.88              | 53.94                 | $9.22 \times 10^{-11}$      |
|                    | 55               | 13.76              | 29.88                 | $1.43 \times 10^{-9}$       |
|                    | 300              | 7.91               | 24.61                 | $2.18 \times 10^{-9}$       |
